# Supplementary material for: A coumarin derived 2-methylthio-4-hydroxypyrimidine[3,4-b]coumarin fluorescent chemosensor for detection of hypochlorite ions in aqueous medium
Source: Research Square preprint supplement (doi:10.21203/rs.3.rs-7954085/v1), 2025-11-12
Supplement: Supplementary file 1 [file 5b77e72db6a3ad7c4c299ca6.docx]

**Supporting Information**

**A coumarin derived 2-methylthio-4-hydroxypyrimidine[3,4-b]coumarin fluorescent chemosensor for detection of hypochlorite ions in aqueous medium**

Arunaa, Kanchana, Arunava Agarwalab and Rahul Shrivastavaa*

aDepartment of Chemistry, Manipal University Jaipur, VPO- Dehmi-Kalan, Off Jaipur-Ajmer Express Way, Jaipur (Rajasthan), 303007 India, E-mail: chem.rahul@gmail.com

bDepartment of Chemistry, Malda College, Malda, 732101, West Bengal, India

**Content:**

1. 1H NMR Spectra coumarin based 2-methylthio-4-hydroxypyrimidine[3,4-b]coumarin fluorescent chemosensor (CTH)
2. 13C NMR Spectra of coumarin based 2-methylthio-4-hydroxypyrimidine[3,4-b]coumarin fluorescent chemosensor (CTH)
3. Mass Spectra of coumarin based 2-methylthio-4-hydroxypyrimidine[3,4-b]coumarin fluorescent chemosensor (CTH)


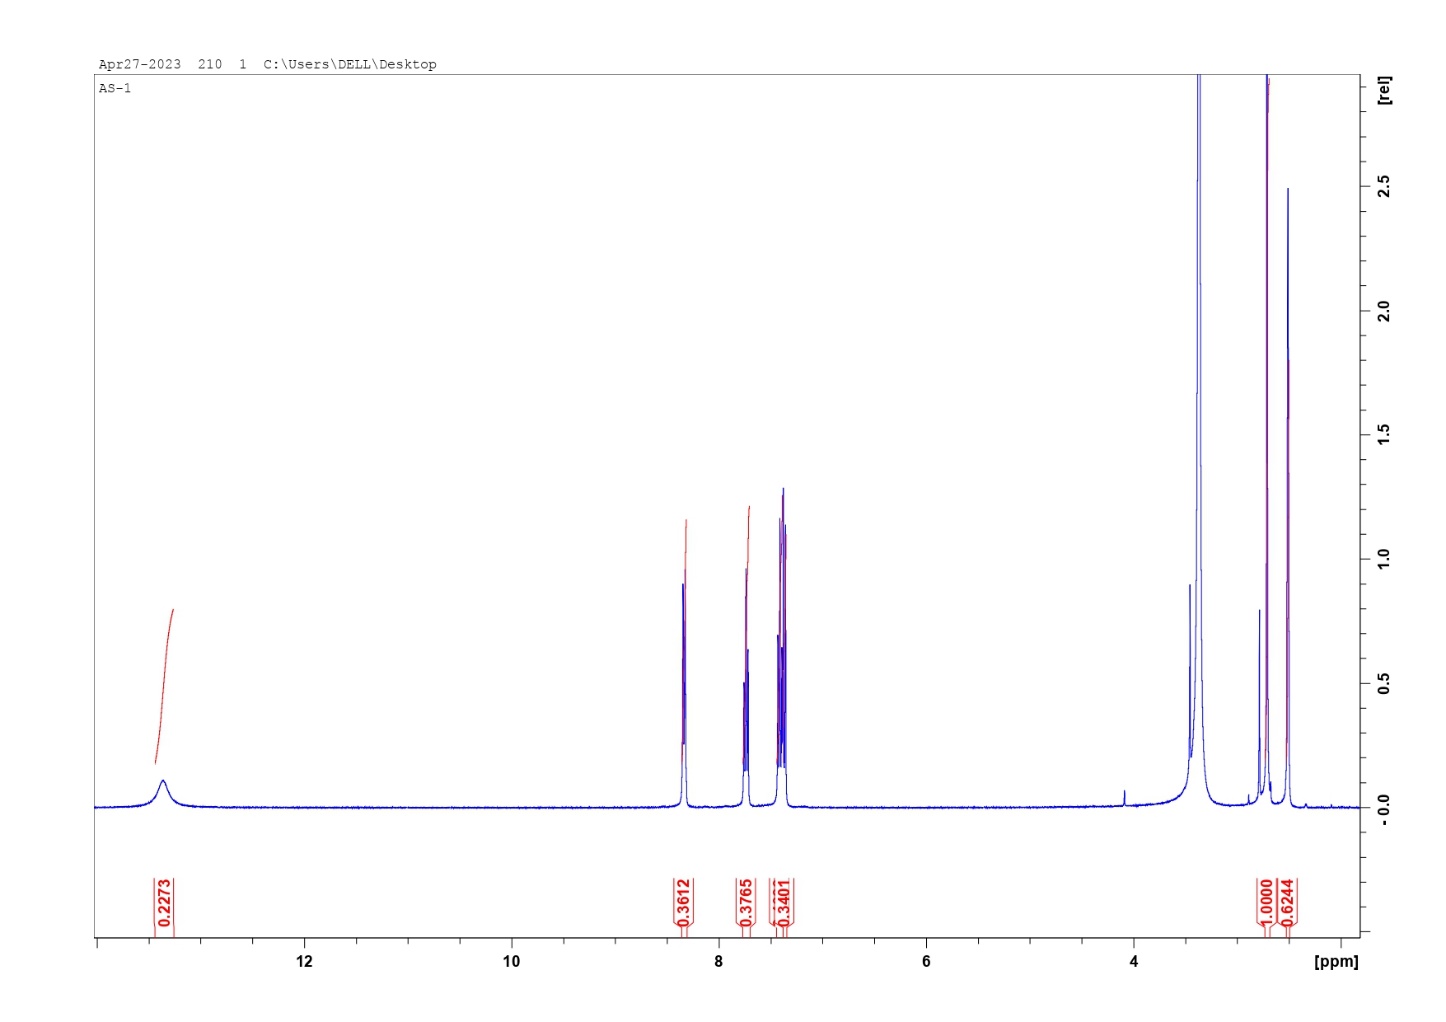


**Figure S1**. 1H NMR Spectra coumarin based 2-methylthio-4-hydroxypyrimidine[3,4-b]coumarin fluorescent chemosensor (CTH)


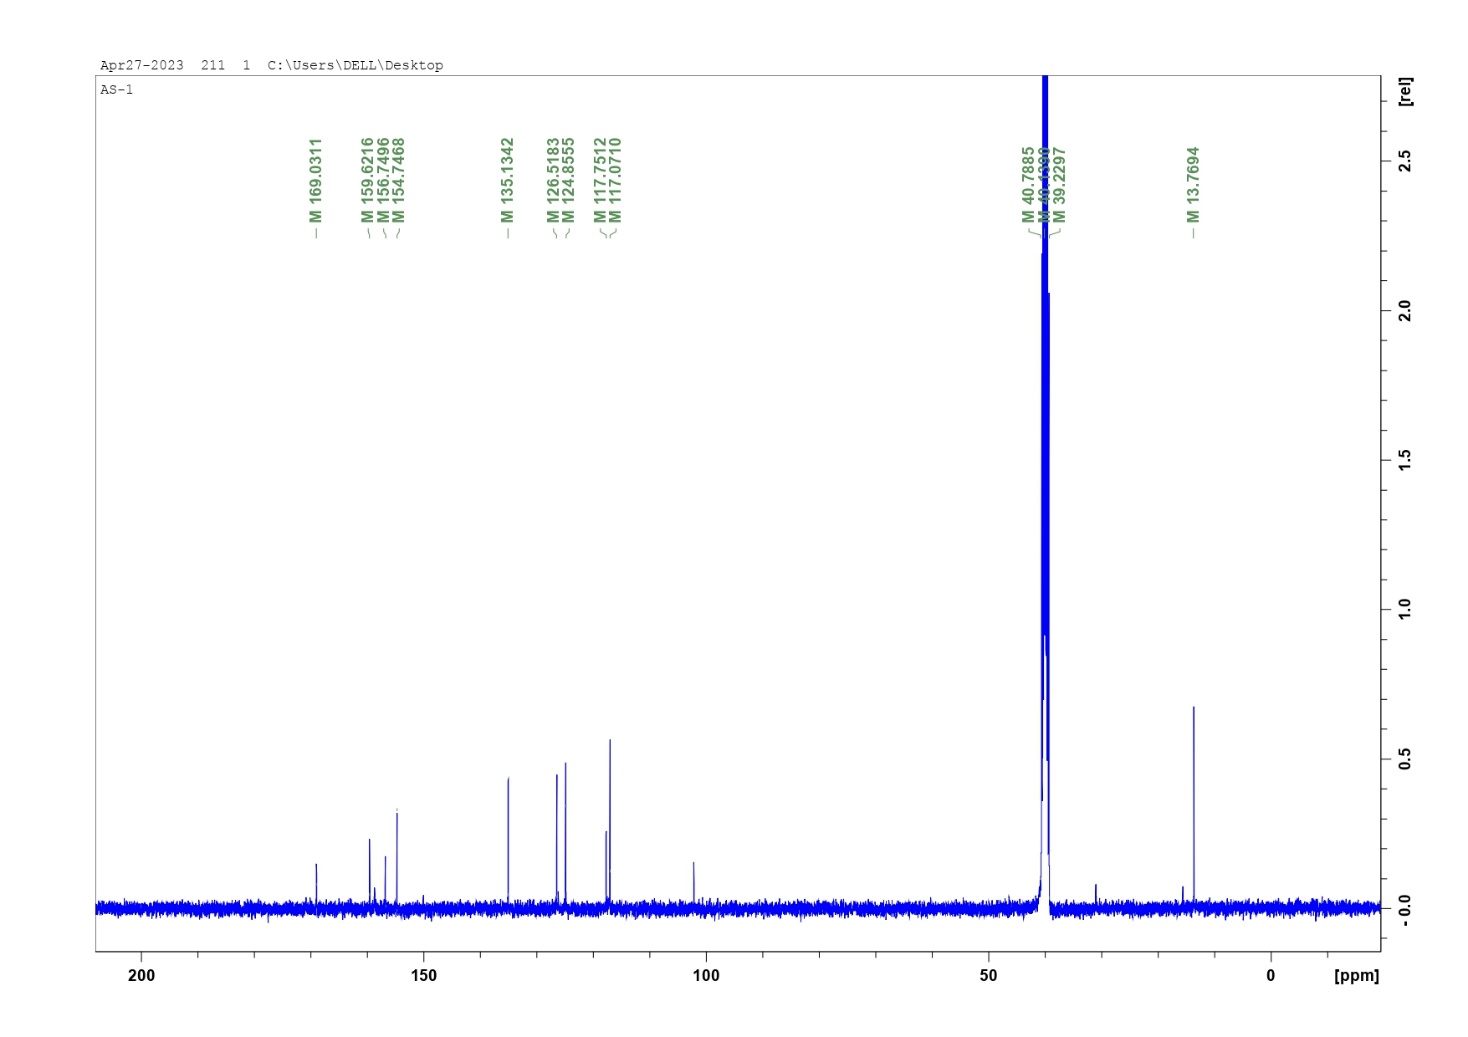


**Figure S2**. 13C NMR Spectra of coumarin based 2-methylthio-4-hydroxypyrimidine[3,4-b]coumarin fluorescent chemosensor (CTH)


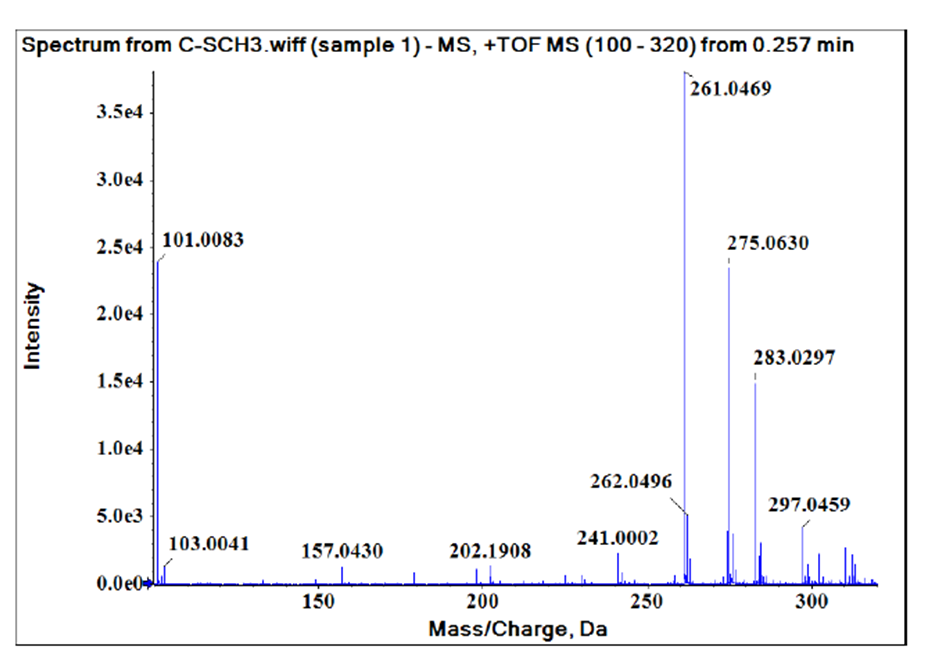


**Figure S3.** Mass Spectra of coumarin based 2-methylthio-4-hydroxypyrimidine[3,4-b]coumarin fluorescent chemosensor (CTH)
